1                   **Mice expressing P301S mutant human tau have deficits in interval timing**

2  
3   Travis Larson<sup>\*,1,2</sup>, Vaibhav Khadelwal<sup>\*,2</sup>, Matthew A. Weber, PhD<sup>2</sup>, Mariah R. Leidinger<sup>3</sup>, David  
4       K. Meyerholz, DVM, PhD<sup>3</sup>, Nandakumar S. Narayanan, MD, PhD<sup>#,2</sup>, Qiang Zhang, MD<sup>#,2</sup>

5  
6  
7   <sup>1</sup>Medical Scientist Training Program, Duke University School of Medicine

8   <sup>2</sup>Department of Neurology, University of Iowa

9   <sup>3</sup>Department of Pathology, University of Iowa

10  
11  
12  
13   Keywords: Alzheimer’s Disease, frontotemporal dementia, tauopathy, interval timing, switch  
14   task

15  
16  
17  
18  
19   \*These authors contributed equally to this manuscript

20  
21  
22   **#Corresponding Authors**

23   Qiang Zhang, MD

24   169 Newton Road

25   Pappajohn Biomedical Discovery Building—5338

26   University of Iowa, Iowa City, 52242

27   319-335-8527

28  
29   Nandakumar S. Narayanan, MD, PhD

30   169 Newton Road

31   Pappajohn Biomedical Discovery Building—5336

32   University of Iowa, Iowa City, 52242

33   319-353-5698

34

35 **HIGHLIGHTS**

- 36       • We examined interval timing behavior in mice expressing P301S mutant tau  
37       • P301S mice responded earlier than littermate controls  
38       • These data provide insight into animal models of tauopathy

39

40 **ABSTRACT**

41 Interval timing is a key executive process that involves estimating the duration of an interval over several  
42 seconds or minutes. Patients with Alzheimer’s disease (AD) have deficits in interval timing. Since  
43 temporal control of action is highly conserved across mammalian species, studying interval timing tasks  
44 in animal AD models may be relevant to human disease. Amyloid plaques and tau neurofibrillary tangles  
45 are hallmark features of AD. While rodent models of amyloid pathology are known to have interval  
46 timing impairments, to our knowledge, interval timing has not been studied in models of tauopathy. Here,  
47 we evaluate interval timing performance of P301S transgenic mice, a widely studied model of tauopathy  
48 that overexpresses human tau with the P301S mutation. We employed the switch interval timing task, and  
49 found that P301S mice consistently underestimated temporal intervals compared to wild-type controls,  
50 responding early in anticipation of the target interval. Our study indicating timing deficits in a mouse  
51 tauopathy model could have relevance to human tauopathies such as AD.

## 52 INTRODUCTION

53 Patients with Alzheimer's disease (AD) have deficits in multiple cognitive domains, including  
54 long-term memory and executive functions (Marshall et al., 2011) such as working memory, attention,  
55 planning, and timing (Brown, 2006; Gilbert & Burgess, 2008). While the neurobiology of amnesic  
56 dysfunction has been previously studied (Jahn, 2013), impairment of executive function in AD is less  
57 understood. Although there are mouse models of key pathophysiological processes in AD (Kimura &  
58 Ohno, 2009; Yoshiyama et al., 2007), studying executive functions in mice can be challenging, because it  
59 is difficult to identify experimental paradigms with translational validity between rodents and humans.  
60 Identifying executive function deficits in AD mouse models is critical to developing novel interventions  
61 for these debilitating aspects of AD.

62 A paradigm that has been used to study executive function in rodent models is interval timing,  
63 which requires subjects to estimate an interval of several seconds with a motor response (Buhusi & Meck,  
64 2005). Interval timing requires working memory to follow temporal rules and attention to the passage of  
65 time (Merchant & de Lafuente, 2014). Interval timing is an ideal executive function to study in  
66 translational models, as deficits in mice can have relevance for human diseases (Parker et al., 2013; Ward  
67 et al., 2011). Interval timing is impaired in AD patients, with greater variability and distortions in  
68 temporal processing relative to controls (Carmen Carrasco, 2000; Caselli et al., 2009; El Haj &  
69 Kapogiannis, 2016). These deficits may be predictive of early disease in AD (Bangert & Balota, 2012).  
70 Familial AD can be caused by mutations in the amyloid precursor protein and presenilin, both of which  
71 lead to aggregation of beta-amyloid plaques (Goedert & Spillantini, 2006). Rodent models of beta-  
72 amyloid aggregation, including APP/swe and 5xFAD, have deficits in interval timing (Armstrong et al.,  
73 2020; Gür, Fertan, Alkins, et al., 2019, respectively). However, AD can also involve intracellular  
74 aggregation of tau, a microtubule-associated protein (Lee et al., 2001; Schwarz et al., 2016). Abnormal  
75 tau is a feature of several brain disorders, including frontotemporal dementia and corticobasal  
76 degeneration (Yoshiyama et al., 2001). Rodent models of tauopathy have widespread synaptic and

77 cognitive deficits (Yoshiyama et al., 2007), leading to our hypothesis that mice expressing mutant tau will  
78 have interval timing deficits.

79 We tested this hypothesis using a P301S transgenic mouse model (Yoshiyama et al., 2007). These  
80 transgenic mice possess the human P301S mutant form of tau, leading to a five-fold higher expression of  
81 tau-4R, one of the two major isoforms of tau (Rademakers et al., 2004). We trained these animals to  
82 perform a “switch” interval timing task, in which they must switch from one nosepoke to the other after a  
83 temporal interval to receive a reward (Balci et al., 2008; Bruce et al., 2021; Tosun et al., 2016). We found  
84 that P301S mice switch at earlier times compared to non-transgenic controls, producing a leftward shift in  
85 time-response functions. These data extend our understanding of executive dysfunction in animal models  
86 of tauopathy, which could be useful for developing new biomarkers or therapies for human tauopathies,  
87 such as AD and frontotemporal dementia.

88

## 89 MATERIAL AND METHODS

90 **Mice:** Experimental procedures were approved by the Institutional Animal Care and Use  
91 Committee (IACUC) at the University of Iowa and performed in accordance with the guidelines set forth  
92 in Protocol #0062039. Thirteen female P301S transgenic mice, (Jackson Labs, Bar Harbor, ME; Strain  
93 #008169, founder line 19) and 9 wild-type female B6C3F1/J littermates were communally housed on a 12  
94 hour light/dark cycle. Both the transgenic and non-transgenic mice began training for the switch interval  
95 timing task at approximately 6 months of age. Mice were weighed daily and kept on a restricted diet for  
96 the duration of the experiment. Water was available ad libitum.

97 **Switch interval timing task:** The switch interval timing task (Fig. 1A) assesses an animal's  
98 ability to control actions based on an internal representation of time (Balci et al., 2008; Bruce et al., 2021;  
99 Tosun et al., 2016). Mice were trained to perform the task in operant chambers (MedAssociates, St.  
100 Albans, VT) placed in sound attenuating cabinets. The chambers contained two response ports at the  
101 front, separated by a reward hopper, and one response port at the back, opposite the reward hopper. Cues  
102 were generated by a light located above each front port and a speaker that produced an 8-kHz tone at 72  
103 dB during the trials. Infrared beams at each port were used to detect the mouse's responses through  
104 nosepokes. A trial was initiated by a nosepoke at the back, following which the cue lights and tone turned  
105 on for either a 6-second short trial or an 18-second long trial. Short and long trials had identical cues.  
106 Short trials were reinforced with 20-mg sucrose pellets (BioServ, Flemington, NJ) for the first response  
107 after 6 seconds at the designated "short port" (front-left or front-right, counterbalanced across mice).  
108 Long trials were reinforced only when the mouse responded after 18 seconds by "switching" from the  
109 short port to the long port. On these switch trials, mice responded at the short port until after 6 seconds,  
110 when they switched to responding at the long port until reward delivery. Once trained for the switch  
111 interval timing task, four sessions of test data per mouse were collected and analyzed. Experimental  
112 sessions lasted 90 minutes and consisted of equal numbers of short and long trials. Only data from long

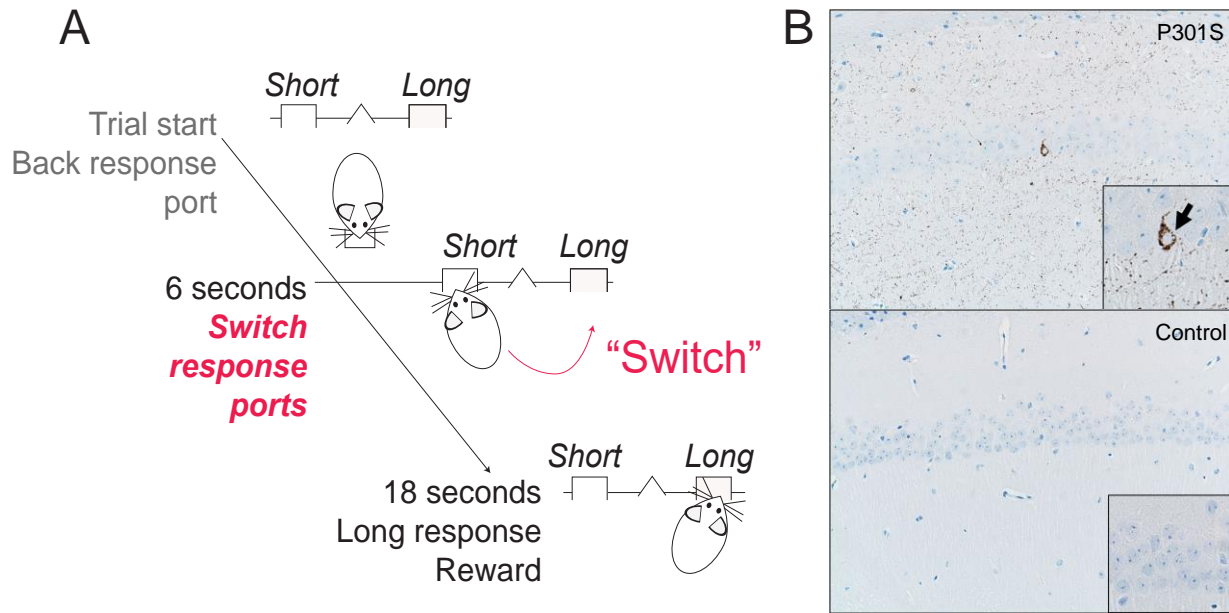

**Figure 1: Switch interval timing task and hippocampal tau pathology in P301S transgenic mice. A)** In the switch interval timing task, mice initiate trials at a back response port. On half the trials, mice were rewarded at the designated short response port after 6 seconds; for the remaining trials, mice were rewarded at the long response port after 18 seconds. The temporal decision to switch (in red) from the short to the long response port is an explicit time-based decision, as in other interval timing tasks. We focused our analysis on these long “switch” trials. **B)** P301S mice have pathological tau accumulation. Phospho-tau antibody (AT8; in brown) staining showed robust phospho-tau deposits in the hippocampus (CA1) of P301S mice. No significant tau deposits were visible in the non-transgenic controls.

113 trials were analyzed. We did not analyze data from two mice (one control and one P301S) that did not  
114 complete more than five switch trials.

115 **Immunohistochemistry:** At approximately 8 months of age, mice were anesthetized with  
116 isoflurane and transcardially perfused with ice-cold phosphate-buffered saline. Brains were collected and  
117 postfixed in 4% paraformaldehyde overnight followed by 30% sucrose for approximately 48 hours. The  
118 Comparative Pathology Laboratory at the University of Iowa performed all sectioning and  
119 immunohistochemistry to visualize tau pathology in the mouse brain (Hefti et al., 2019). Sections (4–5  
120  $\mu\text{m}$ ) were collected and embedded in paraffin. Antigen retrieval was done using citrate buffer (pH 6.0) in  
121 the New Decloaker, 110 °C for 15 minutes, followed by incubation in phospho-tau monoclonal antibody  
122 AT8 (Thermo Fisher, MN1020, Waltham, Massachusetts, U.S.) antibody (1:1000 in Dako diluent buffer)  
123 for 15 minutes at room temperature. Sections were mounted, counterstained with hematoxylin for 3

124 minutes, and coverslipped. Slides were visualized using an Olympus BX53 microscope, DP73 digital  
125 camera, and CellSens Dimension Software (Olympus, Tokyo, Japan).

126 **Data Analysis:** Data analysis was performed as described previously (Bruce et al., 2021). Our  
127 analysis was limited to long trials only from which we extracted the switch time of each trial, or the time  
128 after trial initiation. On switch trials (Fig. 1A), the mouse made its last response at the short port, thereby  
129 capturing the time when the decision to switch was made. We quantified the cumulative probability of  
130 switch times, as well as the mean switch time and the coefficient of variation. Differences between groups  
131 were compared using the nonparametric Wilcoxon test. All statistical procedures were reviewed by the  
132 Biostatistics and Epidemiology Research and Design Core at the Institute for Clinical and Translational  
133 Sciences at the University of Iowa.

134

135



## 136 RESULTS

### 137 Tau pathology in the frontal cortex and hippocampus of P301S transgenic mice

138 We visualized the distribution of tau in the P301S mouse brain using immunohistochemical  
139 staining with the phospho-tau monoclonal AT8 antibody (Hefti et al., 2019). P301S mice showed strong  
140 tau positive immunostaining, particularly in the hippocampus (Fig. 1B). Tau pathology in the frontal  
141 cortex and striatum was also observed, but was less prominent. No significant tau deposits were apparent  
142 in comparable regions of non-transgenic control mice.

### 143 P301S mice have earlier switch times

144 We trained 13 female P301S mice and 9 female littermate controls to perform the switch interval  
145 timing task. The distribution of switch times (Fig. 2A) indicates that both groups of mice tended to switch  
146 just after 6 seconds, the total duration of a short trial, implying successful acquisition of the task

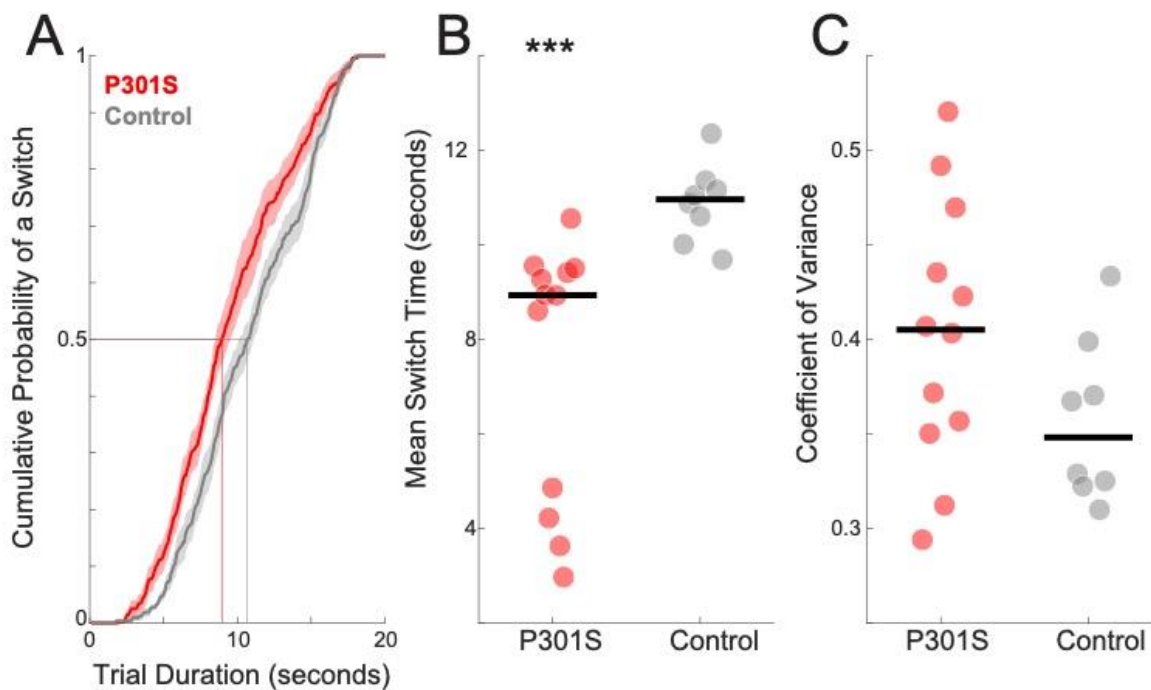

**Figure 2: P301S transgenic mice reliably switched earlier than their non-transgenic counterparts.** A) Cumulative probability distribution of switch times. B) Mean switch time and C) coefficient of variance across four 90-minute test sessions. Data from 12 P301S female mice (in red) and 8 non-transgenic control female mice (in gray). \*\*\*:  $p < 0.001$ .

147 parameters. Additionally, the probability function for the transgenic mice was shifted to the left relative to  
148 the non-transgenic control mice, indicating that the P301S transgenic mice reliably switched earlier  
149 (median: 8.9 seconds (intraquartile range: 4.7–9.4 seconds)) than the non-transgenic control group (11.0  
150 (10.5–11.2) seconds); Wilcoxon  $p < 0.001$ ; Cohen's  $d = 1.5$ ; Fig. 2B). There was no reliable difference in  
151 the coefficient of variation between P301S and non-transgenic mice (Fig. 2C; P301S: 0.41 (0.36–0.44);  
152 non-transgenic: 0.35 (0.32–0.38); Wilcoxon  $p = 0.14$ ; Cohen's  $d = 0.75$ ). There was also no reliable  
153 difference between the number of responses (P301S: 102 (75–126); non-transgenic: 95.25 (84–113);  
154 Wilcoxon  $p = 0.90$ ; Cohen's  $d = 0.14$ ) and the total number of rewards (P301S: 40 (29–42); non-  
155 transgenic: 31 (27–34); Wilcoxon  $p = 0.08$ ; Cohen's  $d = 0.8$ ).

156

157 **DISCUSSION**

158           We examined interval timing performance in transgenic mice expressing human tau with the  
159 P301S mutation. We found consistent evidence of deficits in switch timing performance, with P301S  
160 mice switching earlier in the trial, without a change in variability or response rate. Our data indicates that  
161 animal tauopathy models can exhibit interval timing deficits consistent with anticipatory responding.  
162 Since multiple cognitive processes, such as motivation, working memory, and attention underlie temporal  
163 anticipatory behavior (Balsam et al., 2009), this insight could be useful both for a better understanding of  
164 tauopathies and for developing and testing new interventions aimed at executive dysfunction in human  
165 tauopathies.

166           Our work is supported by prior work on animal models of AD. Gür et al. (2019) found that  
167 3xFAD mice had comparable interval timing performance to wild-type controls (Gür, Fertan, Kosel, et  
168 al., 2019). In a follow-up study in 5xFAD mice, the same group found that female 5xFAD mice  
169 responded significantly earlier with shorter peak times, consistent with increased anticipatory responding  
170 (Gür, Fertan, Alkins, et al., 2019), which might be associated with hippocampal-based memory processes.  
171 Similar results were found in the APP<sup>swe</sup>/PS1<sup>dE9</sup> model of AD (Armstrong et al., 2020), with increased  
172 variability and earlier timing peaks. Our results from the switch interval timing paradigm also report an  
173 anticipatory “leftward” shift, with earlier switch times but no change in timing variability.

174           Both APP<sup>swe</sup>/PS1<sup>dE9</sup> and 5xFAD mice have marked neurodegeneration of the hippocampus, as  
175 well as other structures, due to beta-amyloid pathology (Garcia-Alloza et al., 2006; Kimura & Ohno,  
176 2009, respectively). Studies in rodents with hippocampal lesions using the peak interval procedure, in  
177 which subjects estimate a fixed time interval, have found similar leftward shifts in time estimation (Meck  
178 et al., 1984, 2013). The P301S tau model, which involves mutations in human tau, overlaps with  
179 frontotemporal dementia (Lee et al., 2001; Rademakers et al., 2004; Yoshiyama et al., 2007) and exhibits  
180 abnormal tau in the frontal cortex and striatum, as well as the hippocampus (Yoshiyama et al., 2007).  
181 Because frontostriatal circuits play a key role in interval timing, they may have interacted with

182 hippocampal deficits to produce the marked leftward shift we observed in this study (Emmons et al.,  
183 2020; Emmons et al., 2016; Meck et al., 1984).

184 Human AD patients have a range of hippocampal-dependent impairments (West et al., 1994).  
185 AD patients have decreased ability to discriminate between short intervals and have greater variance for  
186 temporal judgements in the sub-second range (Caselli et al., 2009). This variance carried through to  
187 longer intervals of 5–25 seconds (Carmen Carrasco, 2000). Such impairments could be exacerbated  
188 during dual-task conditions (Papagno et al., 2004) and might exist in patients with early AD (Bangert &  
189 Balota, 2012). Human AD is incredibly complex, involving multiple proteins, cellular processes, and  
190 brain regions; however, animals that model aspects of AD may be useful in developing new  
191 understanding of disease processes, biomarkers, and therapies. This study extends prior work on animal  
192 models of beta-amyloid to animal models of tau. Furthermore, the P301S transgenic mouse line models  
193 aspects of human frontotemporal dementia, which also can present with timing impairments (Wiener &  
194 Coslett, 2008).

195 Our study has several limitations. First, P301S mice overexpress tau-4R, one of the two major  
196 isoforms of tau, limiting our conclusions to only a specific tau isoform. Second, the distribution of  
197 accumulated tau is widespread, making it difficult for us to definitively trace the anatomical correlates of  
198 the observed differences. Future studies leveraging regional overexpression of tau might be able to  
199 localize tau overexpression to a specific circuit. Third, we restricted our study to female mice that were  
200 reported in prior work and were available from Jackson Labs (Armstrong et al., 2020). Finally, our use of  
201 interval timing may not capture the entire domain of cognitive deficits in human tauopathies.

202 Our study utilizes a mouse model of tauopathy and demonstrates that tau pathology alone might  
203 induce deficits in interval timing behavior. We observed high tau deposition in the hippocampus,  
204 reinforcing the importance of temporal memory in interval timing. We propose that future work should

205 aim at generalizing these results to other models of tauopathy with targeted tau deposition, to better

206 elucidate mechanisms and inform future clinical interventions.

207

208 **REFERENCES**

- 209 Armstrong, P., Pardon, M.-C., & Bonardi, C. (2020). Timing impairments in early Alzheimer's disease:  
210 Evidence from a mouse model. *Behavioral Neuroscience*, *134*(2), 82–100.  
211 <https://doi.org/10.1037/bne0000359>
- 212 Balci, F., Papachristos, E. B., Gallistel, C. R., Brunner, D., Gibson, J., & Shumyatsky, G. P. (2008).  
213 Interval timing in genetically modified mice: A simple paradigm. *Genes, Brain, and Behavior*,  
214 *7*(3), 373–384. <https://doi.org/10.1111/j.1601-183X.2007.00348.x>
- 215 Balsam, P., Sanchez-Castillo, H., Taylor, K., Van Volkinburg, H., & Ward, R. D. (2009). Timing and  
216 anticipation: Conceptual and methodological approaches. *European Journal of Neuroscience*,  
217 *30*(9), 1749–1755. <https://doi.org/10.1111/j.1460-9568.2009.06967.x>
- 218 Bangert, A. S., & Balota, D. A. (2012). Keep Up the Pace: Declines in Simple Repetitive Timing  
219 Differentiate Healthy Aging from the Earliest Stages of Alzheimer's Disease. *Journal of the*  
220 *International Neuropsychological Society*, *18*(6), 1052–1063.  
221 <https://doi.org/10.1017/S1355617712000860>
- 222 Brown, S. W. (2006). Timing and executive function: Bidirectional interference between concurrent  
223 temporal production and randomization tasks. *Memory & Cognition*, *34*(7), 1464–1471.  
224 <https://doi.org/10.3758/BF03195911>
- 225 Bruce, R. A., Weber, M. A., Volkman, R. A., Oya, M., Emmons, E. B., Kim, Y., & Narayanan, N. S.  
226 (2021). Experience-related enhancements in striatal temporal encoding. *The European Journal of*  
227 *Neuroscience*, *54*(3), 5063–5074. <https://doi.org/10.1111/ejn.15344>
- 228 Buhusi, C. V., & Meck, W. H. (2005). What makes us tick? Functional and neural mechanisms of interval  
229 timing. *Nature Reviews. Neuroscience*, *6*(10), 755–765. <https://doi.org/10.1038/nrn1764>
- 230 Carmen Carrasco, M. J. G., Rosa Redolat, M. (2000). Estimation of Short Temporal Intervals in  
231 Alzheimer's Disease. *Experimental Aging Research*, *26*(2), 139–151.  
232 <https://doi.org/10.1080/036107300243605>

- 233 Caselli, L., Iaboli, L., & Nichelli, P. (2009). Time estimation in mild Alzheimer's disease patients.  
234 *Behavioral and Brain Functions : BBF*, 5, 32. <https://doi.org/10.1186/1744-9081-5-32>
- 235 El Haj, M., & Kapogiannis, D. (2016). Time distortions in Alzheimer's disease: A systematic review and  
236 theoretical integration. *Npj Aging and Mechanisms of Disease*, 2(1), 1–5.  
237 <https://doi.org/10.1038/npjamd.2016.16>
- 238 Emmons, E. B., Ruggiero, R. N., Kelley, R. M., Parker, K. L., & Narayanan, N. S. (2016). Corticostriatal  
239 Field Potentials Are Modulated at Delta and Theta Frequencies during Interval-Timing Task in  
240 Rodents. *Frontiers in Psychology*, 7. <https://doi.org/10.3389/fpsyg.2016.00459>
- 241 Emmons, E., Tunes-Chiuffa, G., Choi, J., Bruce, R. A., Weber, M. A., Kim, Y., & Narayanan, N. S.  
242 (2020). Temporal Learning Among Prefrontal and Striatal Ensembles. *Cerebral Cortex*  
243 *Communications*, 1(tgaa058). <https://doi.org/10.1093/texcom/tgaa058>
- 244 Garcia-Alloza, M., Robbins, E. M., Zhang-Nunes, S. X., Purcell, S. M., Betensky, R. A., Raju, S., Prada,  
245 C., Greenberg, S. M., Bacskai, B. J., & Frosch, M. P. (2006). Characterization of amyloid  
246 deposition in the APP<sup>swe</sup>/PS1<sup>dE9</sup> mouse model of Alzheimer disease. *Neurobiology of Disease*,  
247 24(3), 516–524. <https://doi.org/10.1016/j.nbd.2006.08.017>
- 248 Gilbert, S. J., & Burgess, P. W. (2008). Executive function. *Current Biology*, 18(3), R110–R114.  
249 <https://doi.org/10.1016/j.cub.2007.12.014>
- 250 Goedert, M., & Spillantini, M. G. (2006). A Century of Alzheimer's Disease. *Science*, 314(5800), 777–  
251 781. <https://doi.org/10.1126/science.1132814>
- 252 Gür, E., Fertan, E., Alkins, K., Wong, A. A., Brown, R. E., & Balci, F. (2019). Interval timing is  
253 disrupted in female 5xFAD mice: An indication of altered memory processes. *Journal of*  
254 *Neuroscience Research*, 97(7), 817–827. <https://doi.org/10.1002/jnr.24418>
- 255 Gür, E., Fertan, E., Kosel, F., Wong, A. A., Balci, F., & Brown, R. E. (2019). Sex differences in the  
256 timing behavior performance of 3xTg-AD and wild-type mice in the peak interval procedure.  
257 *Behavioural Brain Research*, 360, 235–243. <https://doi.org/10.1016/j.bbr.2018.11.047>

- 258 Hefti, M. M., Kim, S., Bell, A. J., Betters, R. K., Fiock, K. L., Iida, M. A., Smalley, M. E., Farrell, K.,  
259 Fowkes, M. E., & Crary, J. F. (2019). Tau Phosphorylation and Aggregation in the Developing  
260 Human Brain. *Journal of Neuropathology and Experimental Neurology*, 78(10), 930–938.  
261 <https://doi.org/10.1093/jnen/nlz073>
- 262 Jahn, H. (2013). Memory loss in Alzheimer’s disease. *Dialogues in Clinical Neuroscience*, 15(4), 445–  
263 454.
- 264 Kimura, R., & Ohno, M. (2009). Impairments in remote memory stabilization precede hippocampal  
265 synaptic and cognitive failures in 5XFAD Alzheimer mouse model. *Neurobiology of Disease*,  
266 33(2), 229–235. <https://doi.org/10.1016/j.nbd.2008.10.006>
- 267 Lee, V. M.-Y., Goedert, M., & Trojanowski, J. Q. (2001). Neurodegenerative Tauopathies. *Annual*  
268 *Review of Neuroscience*, 24(1), 1121–1159. <https://doi.org/10.1146/annurev.neuro.24.1.1121>
- 269 Marshall, G. A., Rentz, D. M., Frey, M. T., Locascio, J. J., Johnson, K. A., & Sperling, R. A. (2011).  
270 Executive function and instrumental activities of daily living in mild cognitive impairment and  
271 Alzheimer’s disease. *Alzheimer’s & Dementia*, 7(3), 300–308.  
272 <https://doi.org/10.1016/j.jalz.2010.04.005>
- 273 Meck, W. H., Church, R. M., & Matell, M. S. (2013). Hippocampus, time, and memory—A retrospective  
274 analysis. *Behavioral Neuroscience*, 127(5), 642–654. <https://doi.org/10.1037/a0034201>
- 275 Meck, W. H., Church, R. M., & Olton, D. S. (1984). Hippocampus, time, and memory. *Behavioral*  
276 *Neuroscience*, 98(1), 3–22. <https://doi.org/10.1037/0735-7044.98.1.3>
- 277 Merchant, H., & de Lafuente, V. (2014). Introduction to the neurobiology of interval timing. *Advances in*  
278 *Experimental Medicine and Biology*, 829, 1–13. [https://doi.org/10.1007/978-1-4939-1782-2\\_1](https://doi.org/10.1007/978-1-4939-1782-2_1)
- 279 Papagno, C., Allegra, A., & Cardaci, M. (2004). Time estimation in Alzheimer’s disease and the role of  
280 the central executive. *Brain and Cognition*, 54(1), 18–23.
- 281 Parker, K. L., Lamichhane, D., Caetano, M. S., & Narayanan, N. S. (2013). Executive dysfunction in  
282 Parkinson’s disease and timing deficits. *Frontiers in Integrative Neuroscience*, 7, 75.  
283 <https://doi.org/10.3389/fnint.2013.00075>



- 284 Rademakers, R., Cruts, M., & van Broeckhoven, C. (2004). The role of tau (MAPT) in frontotemporal  
285 dementia and related tauopathies. *Human Mutation*, 24(4), 277–295.  
286 <https://doi.org/10.1002/humu.20086>
- 287 Schwarz, A. J., Yu, P., Miller, B. B., Shcherbinin, S., Dickson, J., Navitsky, M., Joshi, A. D., Devous, M.  
288 D., Sr, & Mintun, M. S. (2016). Regional profiles of the candidate tau PET ligand 18 F-AV-1451  
289 recapitulate key features of Braak histopathological stages. *Brain*, 139(5), 1539–1550.  
290 <https://doi.org/10.1093/brain/aww023>
- 291 Tosun, T., Gur, E., & Balci, F. (2016). Mice plan decision strategies based on previously learned time  
292 intervals, locations, and probabilities. *Proceedings of the National Academy of Sciences of the*  
293 *United States of America*, 113(3), 787–792. <https://doi.org/10.1073/pnas.1518316113>
- 294 Ward, R. D., Kellendonk, C., Kandel, E. R., & Balsam, P. D. (2011). Timing as a window on cognition in  
295 schizophrenia. *Neuropharmacology*. <https://doi.org/10.1016/j.neuropharm.2011.04.014>
- 296 West, M. J., Coleman, P. D., Flood, D. G., & Troncoso, J. C. (1994). Differences in the pattern of  
297 hippocampal neuronal loss in normal ageing and Alzheimer’s disease. *The Lancet*, 344(8925),  
298 769–772. [https://doi.org/10.1016/S0140-6736\(94\)92338-8](https://doi.org/10.1016/S0140-6736(94)92338-8)
- 299 Wiener, M., & Coslett, H. B. (2008). Disruption of temporal processing in a subject with probable  
300 frontotemporal dementia. *Neuropsychologia*, 46(7), 1927–1939.  
301 <https://doi.org/10.1016/j.neuropsychologia.2008.01.021>
- 302 Yoshiyama, Y., Higuchi, M., Zhang, B., Huang, S.-M., Iwata, N., Saido, T. C., Maeda, J., Suhara, T.,  
303 Trojanowski, J. Q., & Lee, V. M.-Y. (2007). Synapse Loss and Microglial Activation Precede  
304 Tangles in a P301S Tauopathy Mouse Model. *Neuron*, 53(3), 337–351.  
305 <https://doi.org/10.1016/j.neuron.2007.01.010>
- 306 Yoshiyama, Y., Lee, V. M., & Trojanowski, J. Q. (2001). Frontotemporal dementia and tauopathy.  
307 *Current Neurology and Neuroscience Reports*, 1(5), 413–421. [https://doi.org/10.1007/s11910-](https://doi.org/10.1007/s11910-001-0100-0)  
308 [001-0100-0](https://doi.org/10.1007/s11910-001-0100-0)
- 309
